# Supplementary material for: Toxicity assessment of zinc oxide nanoparticles using sub-acute and sub-chronic murine inhalation models
Source: Springer Nature journal article supplement (doi:10.1186/1743-8977-11-15), 2014-04-01

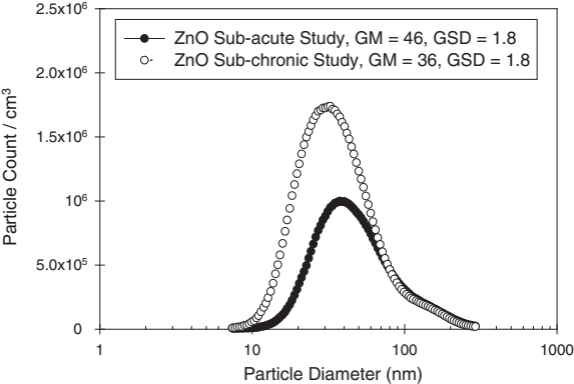

Supplement: 12989_2013_300_MOESM4_ESM.pdf [file 12989_2013_300_MOESM4_ESM.pdf]
