# Supplementary material for: Toxicity assessment of zinc oxide nanoparticles using sub-acute and sub-chronic murine inhalation models
Source: Springer Nature journal article supplement (doi:10.1186/1743-8977-11-15), 2014-04-01

## A. Histopathology Evaluation

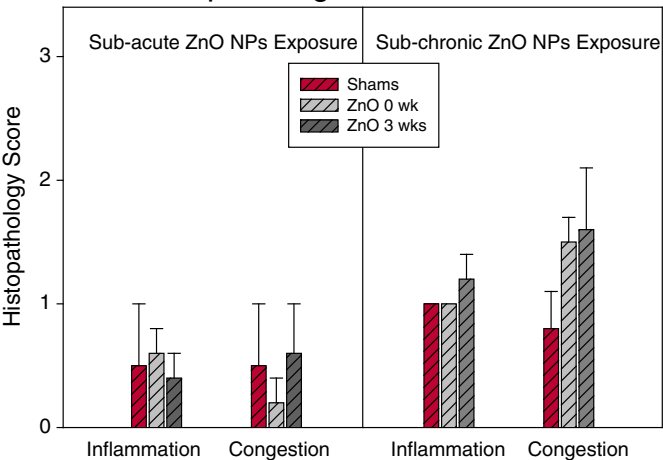

## C. Sub-chronic Study (ZnO 0 wk)

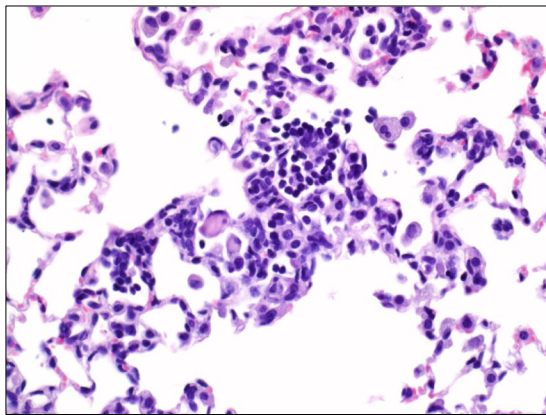

## B. Sub-chronic Study (Sham)

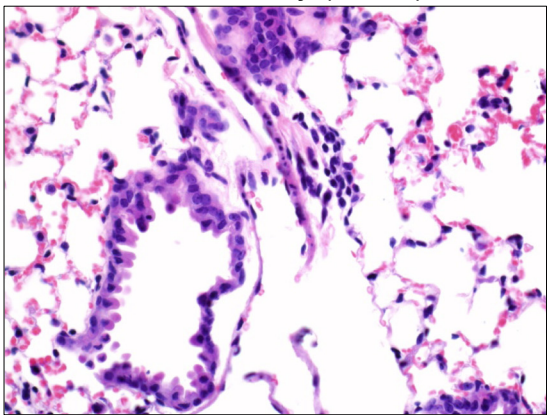

## D. Sub-chronic Study (ZnO 3 wks)

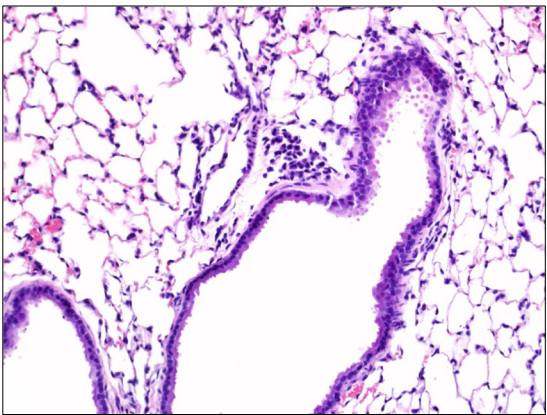

Supplement: 12989_2013_300_MOESM8_ESM.pdf [file 12989_2013_300_MOESM8_ESM.pdf]
